# Supplementary material for: Cell Context Dependent p53 Genome-Wide Binding Patterns and Enrichment at Repeats
Source: PubMed Central journal article supplement (PMC4240582; doi:10.1371/journal.pone.0113492), 2014-11-21
Supplement: pone.0113492.s002.pdf [file pone.0113492.s002.pdf]

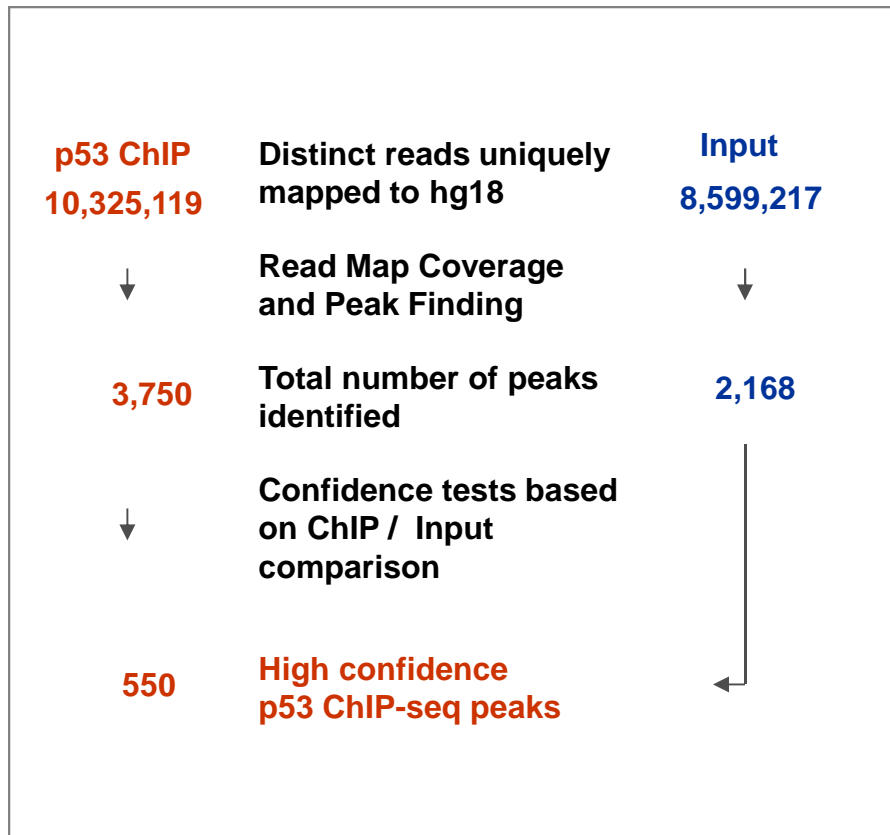

Figure S2. Defining high-confidence p53 ChIP-seq peaks in HCT116.
