# Supplementary material for: Cell Context Dependent p53 Genome-Wide Binding Patterns and Enrichment at Repeats
Source: PLoS One. 2014 Nov 21;9(11):e113492. doi: 10.1371/journal.pone.0113492 (PMC4240582; doi:10.1371/journal.pone.0113492)
Supplement: Table S1 — Sequencing runs statistics. (XLSX) [file pone.0113492.s003.xlsx]

## Sheet: Table S1
Table S1.
Sequencing runs statistics.
	HCT116 Input-seq****		HCT116 p53 ChIP-seq****
	counts	%	counts	%
Total sequence reads obtained	11618046	100	13769858	100
Not found hg18	1559272	13.42	1553433	11.28
Mapped hg18 *	10058774	86.58	12216425	88.72
Mapped hg18	10058774	100	12216425	100
Mapped uniquely hg18	8920780	88.69	10917406	89.37
Mapped multiple hg18	1137994	11.31	1299019	10.63
Total sequence reads obtained	11618046	100	13769858	100
Redundant sequence reads **	963276	8.29	1305262	9.48
Distinct sequence reads	10654770	91.71	12464596	90.52
Distinct sequence reads	10654770	100	12464596	100
Distinct not found hg18	1151177	10.8	1133638	9.09
Distinct mapped hg18	9503593	89.2	11330958	90.91
Distinct mapped multiple	904376	8.49	1005839	8.07
Distinct mapped uniquely hg18 ***	8599217	80.71	10325119	82.84
* Sequenced reads were mapped against human reference genome assembly hg18 (NCBI Build 36.1) allowing 1 missmatch.
** Defined as reads that have matching hg18 coordinates
*** Sequences subjected to further analysis for peak finding
**** After 6rhs teratment with 5FU
